# Supplementary material for: An efficient WS2/Ni3S2 monolithic electrode for the hydrogen evolution reaction at industrial current densities
Source: Royal Society of Chemistry journal article supplement (doi:10.1039/d5ta02183a), 2025-01-01
Supplement: d5ta02183a1.pdf [file d5ta02183a1.pdf]

## Supplementary Information

An efficient WS<sub>2</sub>/Ni<sub>3</sub>S<sub>2</sub> monolithic electrode for the hydrogen evolution reaction at industrial current densities

Huifang Wei <sup>a, 1</sup>, Denghui Ma <sup>a, 1</sup>, Guomin Li <sup>c</sup>, Wangwang Zhang <sup>c</sup>, Shiyao Cao <sup>b, \*</sup>,  
Jianming Li <sup>a, \*</sup>

*a School of New Energy, Ningbo University of Technology, Ningbo, 315211, China*

*b PetroChina Shenzhen New Energy Research Institute Co., LTD. Shenzhen 518052, China*

*c Collaborative Innovation Center of Chemistry for Energy Materials, College of Chemistry and Chemical Engineering, Xiamen University, Xiamen 361005, China*

*\* Corresponding Authors.*

*E-mail addresses:* [jmli@nbut.edu.cn](mailto:jmli@nbut.edu.cn) (Jianming Li), [csy123@petrochina.com.cn](mailto:csy123@petrochina.com.cn) (Shiyao Cao).

<sup>1</sup> These authors contributed equally to this work.

## 1 Preparation of the 2WS<sub>2</sub>/Ni<sub>3</sub>S<sub>2</sub>-NF catalyst.

2 Ammonium tungstate ((NH<sub>4</sub>)<sub>10</sub>W<sub>12</sub>O<sub>41</sub>~xH<sub>2</sub>O), potassium hydroxide (KOH, AR),  
3 and thiourea were obtained from Sinopharm chemical reagent Co., Ltd. All chemicals  
4 were used without further purification. For the preparation of 2WS<sub>2</sub>/Ni<sub>3</sub>S<sub>2</sub>-NF catalyst,  
5 40 mg (NH<sub>4</sub>)<sub>10</sub>W<sub>12</sub>O<sub>41</sub>~xH<sub>2</sub>O and 20 mg thiourea were dispersed in 600 μL deionized  
6 water. Afterward, the solution was cautiously added on the surface of nickel foam (NF,  
7 1 cm ×1 cm) drop by drop. And then, the decorated NF was transferred into a CVD  
8 furnace and annealed at 400 °C for 4 h with a temperature ramping rate of 10 °C min<sup>-1</sup>  
9 under 50% H<sub>2</sub> and 50% Ar atmosphere. The monolithic catalyst WS<sub>2</sub>/Ni<sub>3</sub>S<sub>2</sub>-NF was  
10 prepared. The Ni<sub>3</sub>S<sub>2</sub> was synthesized via the same method except for the absence of  
11 (NH<sub>4</sub>)<sub>10</sub>W<sub>12</sub>O<sub>41</sub>~xH<sub>2</sub>O. When the mass of (NH<sub>4</sub>)<sub>10</sub>W<sub>12</sub>O<sub>41</sub>~xH<sub>2</sub>O is 20, 40 and 60 mg  
12 respectively, the catalysts are labeled as 1WS<sub>2</sub>/Ni<sub>3</sub>S<sub>2</sub>-NF, 2WS<sub>2</sub>/Ni<sub>3</sub>S<sub>2</sub>-NF and  
13 3WS<sub>2</sub>/Ni<sub>3</sub>S<sub>2</sub>-NF. Pt/C-NF catalyst was prepared by dropping aqueous solution  
14 containing 10 mg commercial 20% Pt/C onto NF.

## 15 Materials characterizations.

16 The scanning electron micrograph (SEM) was performed on the ZEISS Sigma at  
17 20 kV. High-resolution transmission electron microscopy (HRTEM) was performed by  
18 using the FEI Tecnai F20 microscope at an accelerating voltage of 200 kV. X-ray  
19 diffraction (XRD) was performed on SmartLab-SE XRD at 40 kV and 30 mA using Cu  
20 Kα radiation (λ=1.5418 Å) at a scan rate of 10 degrees per minute. Raman spectra were  
21 collected using 532 nm laser excitation with a beam size of ~1 μm (Horiba LabRAB  
22 HR800, Japan). X-ray photoelectron spectroscopy (XPS) data was acquired with PHI  
23 Quantera-2000.

## 24 Electrochemical measurements.

25 Electrochemical measurements were performed on CHI 760 electrochemical  
26 workstations in three-electrode or two-electrode systems in 1 M or 6 M KOH at 25 or  
27 85 °C. In the HER process, nickel foam and Hg/HgO electrode were used as counter  
28 and reference electrodes, respectively. The 2WS<sub>2</sub>/Ni<sub>3</sub>S<sub>2</sub>-NF electrode was a working  
29 electrode. In the water electrolysis process, both the working and counter electrodes  
30 were 2WS<sub>2</sub>/Ni<sub>3</sub>S<sub>2</sub>-NF electrodes. Linear sweep voltammetry (LSV) curves were  
31 collected in 1 M or 6 M KOH at 25 or 85 °C with the scan rate of 10 mV s<sup>-1</sup> at the  
32 atmosphere of Ar by 85% *i*R compensation. Nyquist measurements were performed

1 with a frequency from  $10^{-1}$  to  $10^5$  Hz at open circuit potential in 1.0 M KOH solution  
2 at 25 °C. The cyclic voltammograms (CVs) were tested in the range of 0.2 to 0.3 V vs.  
3 RHE at different rates from 20 to 180 mV s<sup>-1</sup> in 1.0 M KOH solution at 25 °C. The  
4 chronopotentiometry was tested at 1000 mA cm<sup>-2</sup>. All the potentials were recorded with  
5 respect to the reversible hydrogen electrode (RHE):  $E_{\text{RHE}} = E_{\text{Hg/HgO}} + 0.098 + 0.059 \text{ pH}$ .  
6 When both cathode and anode were 2WS<sub>2</sub>/Ni<sub>3</sub>S<sub>2</sub>-NF, it was denoted as 2WS<sub>2</sub>/Ni<sub>3</sub>S<sub>2</sub>-NF  
7 (+, -).

## 8 Theoretical Calculations.

9 All density functional theory (DFT) calculations were performed through the  
10 Vienna abinitio simulation package (VASP) [1]. The projection-augmented wave  
11 (PAW) method was used to explain the interaction between ions and electrons. The  
12 exchange and correlation energies were evaluated by the generalized gradient  
13 approximation (GGA) with Perdew-Burke-Ernzerhof (PBE) functional [2]. A cutoff  
14 kinetic energy of 400 eV in the plane-wave expansion and Monkhorst-Pack grids were  
15 set up 2×2×1 for WS<sub>2</sub> related surface systems and 2×3×1 for Ni<sub>3</sub>S<sub>2</sub> related surface  
16 systems, respectively. The vacuum layer of 15 Å was set to prevent the interaction  
17 between the images along the z direction. Free energy change  $\Delta G$  of the reaction was  
18 calculated by the following equation:

$$19 \quad \Delta G = \Delta E + \Delta E_{\text{ZPE}} - T\Delta S$$

20 Where  $\Delta E$  represents the electron energy difference from DFT calculations,  $\Delta E_{\text{ZPE}}$  is  
21 the zero-point energy change of surface model systems, and  $\Delta S$  represents the entropy  
22 change. The value of  $\Delta E_{\text{ZPE}} - T\Delta S$  is about 0.24 V [3], so  $\Delta G = \Delta E + 0.24 \text{ eV}$ . Add dipole  
23 corrections along the z direction to obtain correct forces. The van der Waals correction  
24 was considered for the weak interaction via using the DFT+D3 method of Grimme [4].  
25 Furthermore, Bader charge analyses [5] were performed for Ni<sub>3</sub>S<sub>2</sub>(110) and W-doped  
26 Ni<sub>3</sub>S<sub>2</sub>(110) surfaces.

27

28

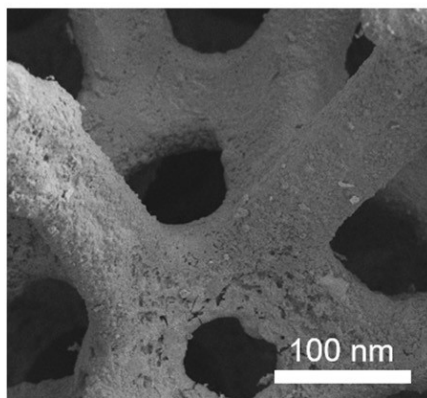

1

2

**Supplementary Fig. 1** The SEM image of the 2WS<sub>2</sub>/Ni<sub>3</sub>S<sub>2</sub>-NF catalyst.

3

1

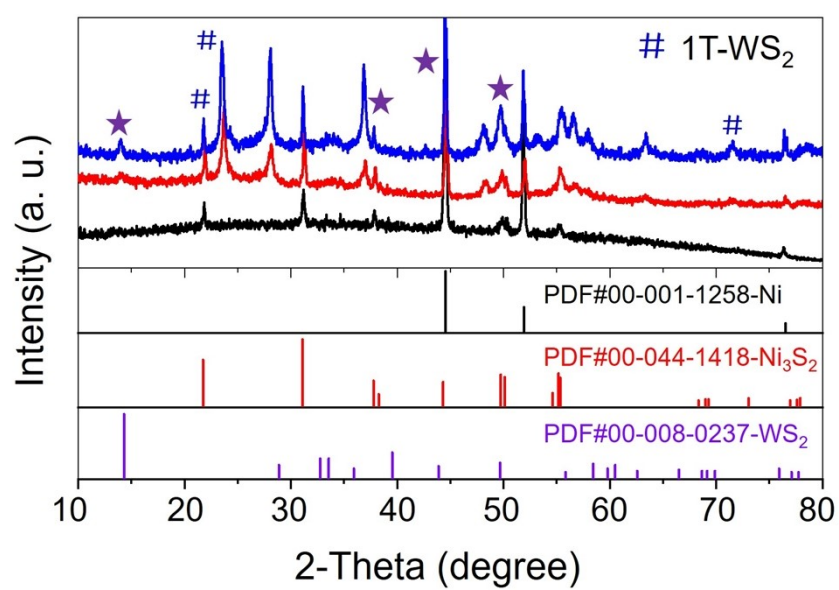

2

3 **Supplementary Fig. 2** XRD analysis of the 1WS<sub>2</sub>/Ni<sub>3</sub>S<sub>2</sub>-NF (black), 2WS<sub>2</sub>/Ni<sub>3</sub>S<sub>2</sub>-NF  
 4 (red) and 3WS<sub>2</sub>/Ni<sub>3</sub>S<sub>2</sub>-NF (blue) catalysts.

5

6

1

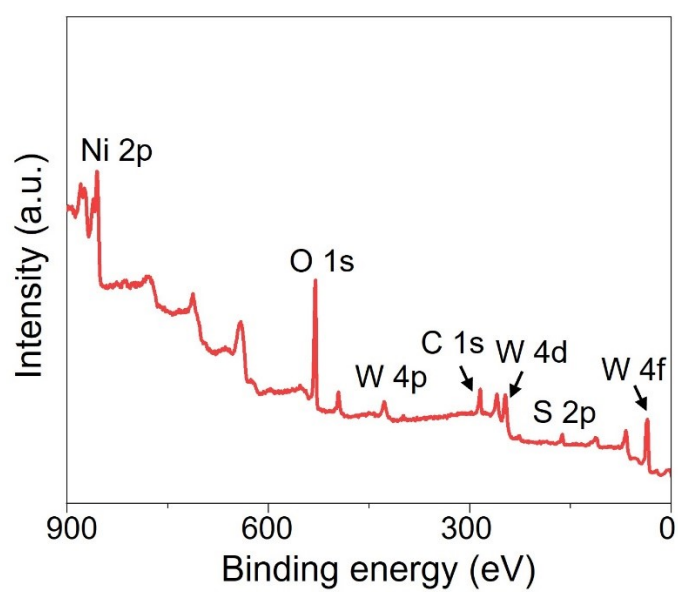

2

3 **Supplementary Fig. 3** XPS survey spectrum of 2WS<sub>2</sub>/Ni<sub>3</sub>S<sub>2</sub>-NF catalyst.

4

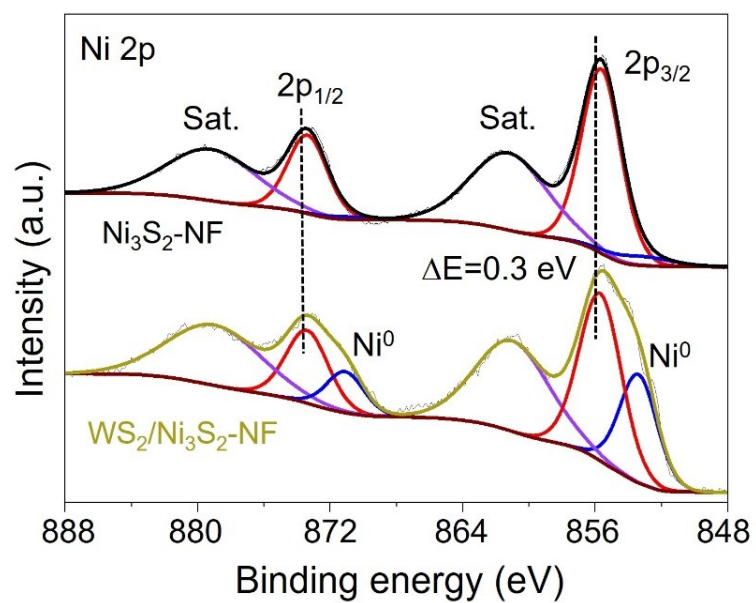

1

2 **Supplementary Fig. 4** XPS spectra of  $\text{WS}_2/\text{Ni}_3\text{S}_2\text{-NF}$  and  $\text{Ni}_3\text{S}_2\text{-NF}$  catalysts for Ni 2p.

3

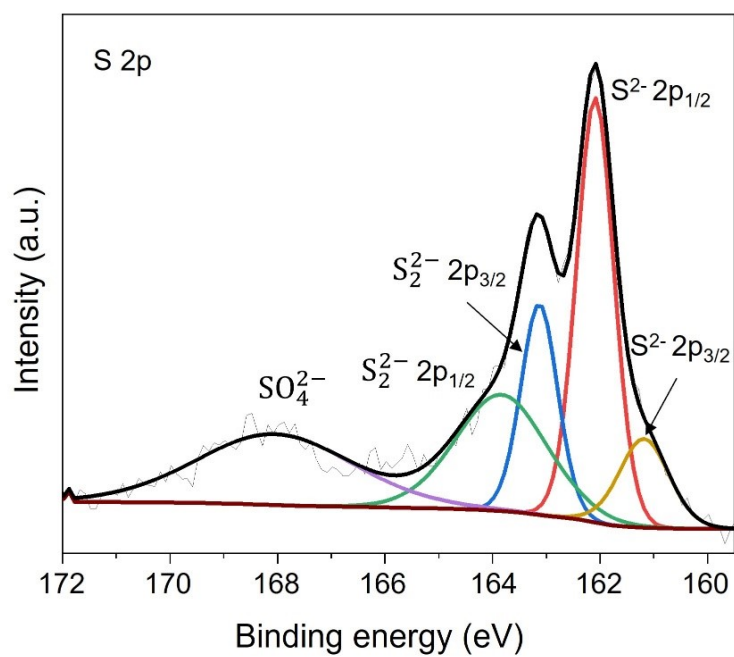

**Supplementary Fig. 5** XPS spectra of WS<sub>2</sub>/Ni<sub>3</sub>S<sub>2</sub>-NF catalyst for S 2p.

1  
2

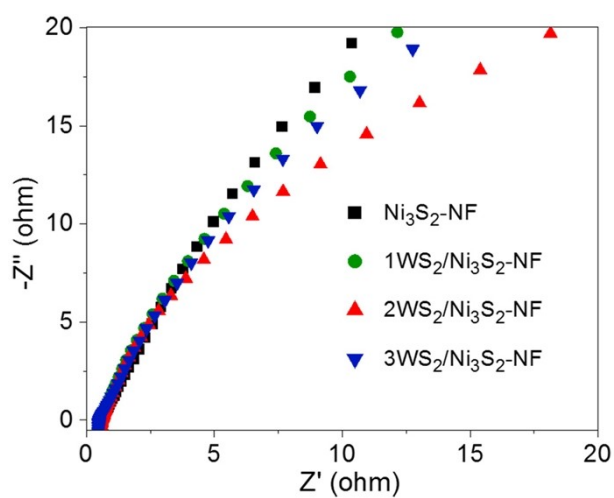

3

4 **Supplementary Fig. 6** The electrochemical impedance spectroscopy of  $\text{Ni}_3\text{S}_2\text{-NF}$ ,  
5  $1\text{WS}_2/\text{Ni}_3\text{S}_2\text{-NF}$ ,  $2\text{WS}_2/\text{Ni}_3\text{S}_2\text{-NF}$ ,  $3\text{WS}_2/\text{Ni}_3\text{S}_2\text{-NF}$  catalysts.

6

1

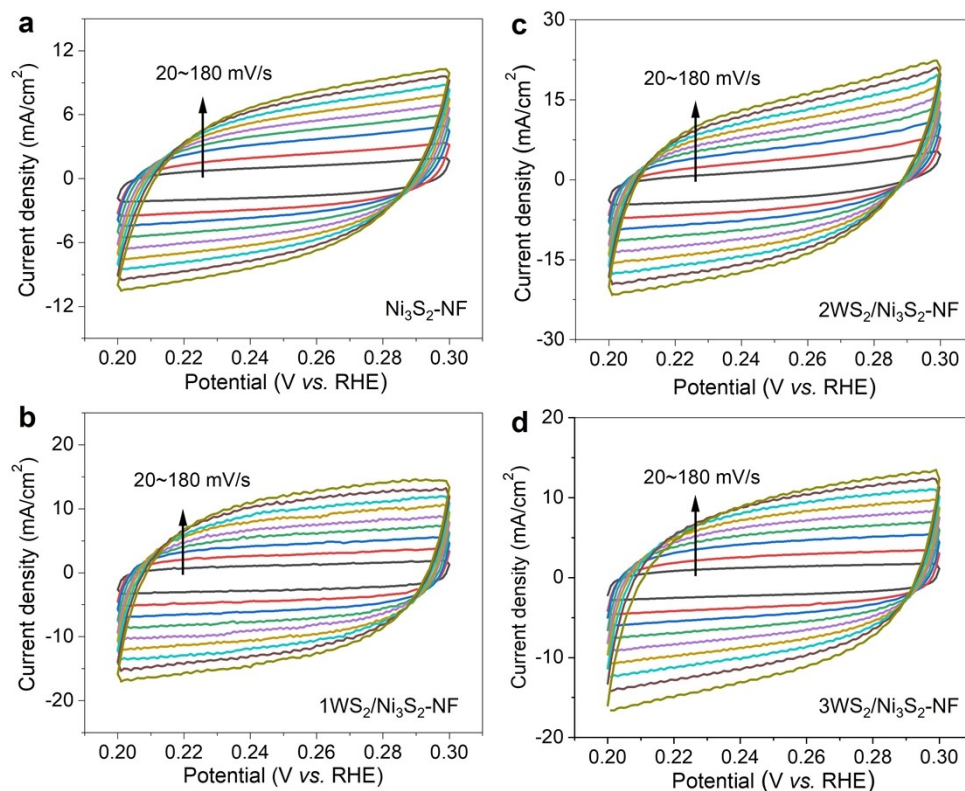

2

3 **Supplementary Fig. 7** CV curves measured within the range of 0.2 to 0.3 V vs. RHE  
 4 with scan rates from 20 to 180  $\text{mV s}^{-1}$  of  $\text{Ni}_3\text{S}_2\text{-NF}$ ,  $1\text{WS}_2/\text{Ni}_3\text{S}_2\text{-NF}$ ,  $2\text{WS}_2/\text{Ni}_3\text{S}_2\text{-NF}$ ,  
 5  $3\text{WS}_2/\text{Ni}_3\text{S}_2\text{-NF}$  catalysts in 1.0 M KOH solution at 25 °C.

6

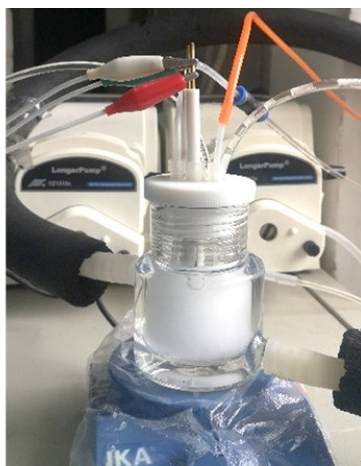

1

2 **Supplementary Fig. 8** The photograph of the overall water splitting device. At high  
3 current density, it is observed that the electrolytic cell is full of bubbles.

4

5

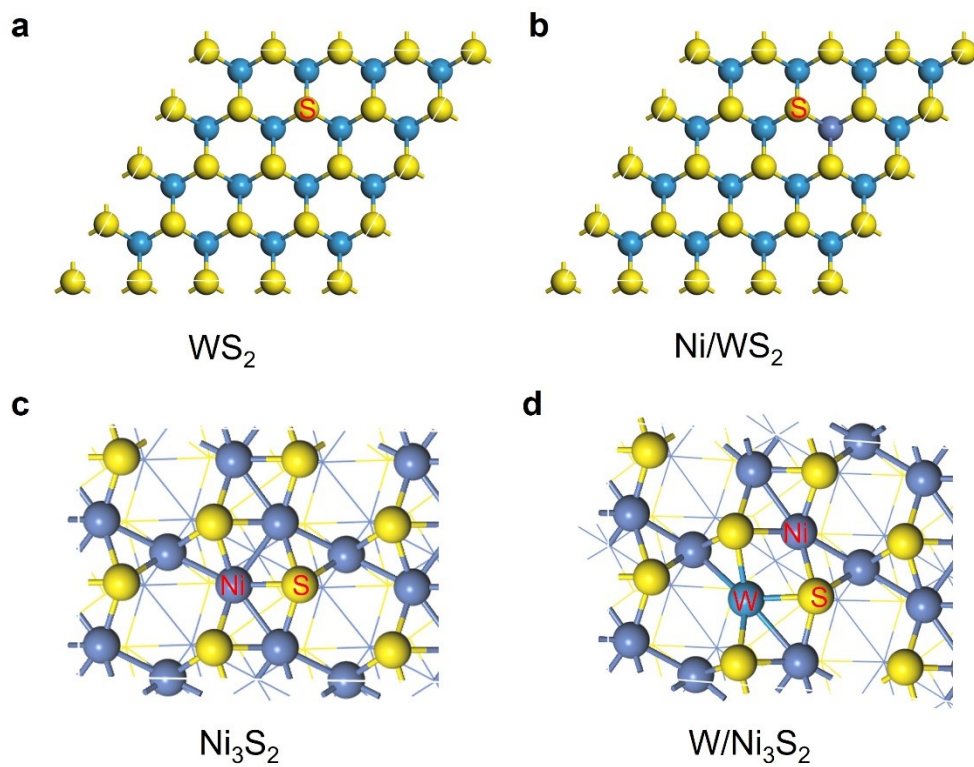

1

2 **Supplementary Fig. 9** Four optimized surface models, (a) pristine WS<sub>2</sub>, (b) Ni-doped  
 3 WS<sub>2</sub> (Ni/WS<sub>2</sub>), (c) pristine Ni<sub>3</sub>S<sub>2</sub>, and (d) W-doped WS<sub>2</sub> (W/Ni<sub>3</sub>S<sub>2</sub>) were labeled with  
 4 different active sites, respectively.

5

1 **Supplementary Table 1** HER performance of different catalysts in 1.0 M KOH  
 2 solution at 25 °C.

| Catalysts                                            | Overpotentials (mV vs. RHE) |              |               |               | $C_{dl}$<br>(mF/cm <sup>2</sup> ) |
|------------------------------------------------------|-----------------------------|--------------|---------------|---------------|-----------------------------------|
|                                                      | $\eta_{100}$                | $\eta_{500}$ | $\eta_{1000}$ | $\eta_{1500}$ |                                   |
| Ni <sub>3</sub> S <sub>2</sub> -NF                   | 267                         | 411          | 503           | 575           | 38.7                              |
| 1WS <sub>2</sub> /Ni <sub>3</sub> S <sub>2</sub> -NF | 224                         | 334          | 402           | 459           | 67.7                              |
| 2WS <sub>2</sub> /Ni <sub>3</sub> S <sub>2</sub> -NF | 234                         | 317          | 350           | 381           | 78.5                              |
| 3WS <sub>2</sub> /Ni <sub>3</sub> S <sub>2</sub> -NF | 220                         | 348          | 462           | 571           | 58.2                              |

3

1 **Supplementary Table 2** Comparison of HER performance of 2WS<sub>2</sub>/Ni<sub>3</sub>S<sub>2</sub>-NF with  
2 reported WS<sub>2</sub> catalysts.

| Catalysts                                              | Electrolyte                          | $\eta_{100}$ (mV<br>vs. RHE) | $\eta_{1000}$ (mV<br>vs. RHE) | Ref.             |
|--------------------------------------------------------|--------------------------------------|------------------------------|-------------------------------|------------------|
| 2WS <sub>2</sub> /Ni <sub>3</sub> S <sub>2</sub> -NF   | 1 M KOH                              | 234                          | 350                           | <b>This work</b> |
| V-WS <sub>2</sub> /CC                                  | 1 M KOH                              | ~260                         | -                             | [6]              |
| Co <sub>9</sub> S <sub>8</sub> /2H-WS <sub>2</sub> @NF | 1 M KOH                              | ~360                         | -                             | [7]              |
| WS/CC                                                  | 1 M KOH                              | ~610                         | -                             | [8]              |
| WS <sub>2</sub> TN/CC                                  | 1 M KOH                              | ~380                         | -                             | [9]              |
| W/WS <sub>2</sub> -WC                                  | 1 M KOH                              | ~150                         | 473                           | [10]             |
| WS <sub>2</sub> /NiS <sub>x</sub>                      | 1 M KOH                              | ~170                         | -                             | [11]             |
| Co-WS <sub>2</sub> /NiTe <sub>2</sub> /Ni              | 1 M KOH                              | ~182                         | -                             | [12]             |
| WS <sub>2</sub> @VS <sub>2</sub>                       | 0.5 M H <sub>2</sub> SO <sub>4</sub> | ~240                         | -                             | [13]             |
| CeO <sub>2</sub> /WS <sub>2</sub> /CC                  | 0.5 M H <sub>2</sub> SO <sub>4</sub> | ~200                         | -                             | [14]             |
| WS <sub>2</sub> NDs                                    | 0.5 M H <sub>2</sub> SO <sub>4</sub> | ~270                         | -                             | [15]             |
| 1T/1T-MWH                                              | 0.5 M H <sub>2</sub> SO <sub>4</sub> | ~400                         | -                             | [16]             |

3

- 1 [1] G. Kresse, J. Hafner, Ab initio molecular-dynamics simulation of the liquid-metal–  
2 amorphous-semiconductor transition in germanium, *Phys. Rev. B*, 49 (1994) 14251.
- 3 [2] Y. Li, C. Peng, H. Hu, S. Chen, J. Choi, Y. Lin, J. Lee, Interstitial boron-triggered  
4 electron-deficient Os aerogels for enhanced pH-universal hydrogen evolution, *Nat.*  
5 *Commun.*, 13 (2022) 1143.
- 6 [3] J.K. Nørskov, T. Bligaard, A. Logadottir, J.R. Kitchin, J.G. Chen, S. Pandalov, U.  
7 Stimming, Trends in the exchange current for hydrogen evolution, *J. Electrochem. Soc.*,  
8 152 (2005) 23.
- 9 [4] S. Grimme, S. Ehrlich, L. Goerigk, Effect of the damping function in dispersion  
10 corrected density functional theory, *J. Comput. Chem.*, 32 (2011) 1456.
- 11 [5] R.F.W. Bader, Atoms in molecules, *Acc. Chem. Res.*, 18 (1985) 9.
- 12 [6] A. Jiang, B. Zhang, Z. Li, G. Jin, J. Hao, Vanadium-doped WS<sub>2</sub> nanosheets grown  
13 on carbon cloth as a highly efficient electrocatalyst for the hydrogen evolution reaction,  
14 *Chem. Asian J.*, 13 (2018) 1438.
- 15 [7] J. Wang, Y. Song, C. Zuo, R. Li, Y. Zhou, Y. Zhang, B. Wu, Y. Huang, An  
16 argyrophylla-like nanorods Co<sub>9</sub>S<sub>8</sub>/2H-WS<sub>2</sub>@NF heterojunction with electrons  
17 redistribution as a highly efficient bifunctional electrocatalyst for overall water  
18 splitting, *ChemCatChem*, 14 (2021) e202101553.
- 19 [8] Q. Zhu, W. Chen, H. Cheng, Z. Lu, H. Pan, WS<sub>2</sub> nanosheets with highly-enhanced  
20 electrochemical activity by facile control of sulfur vacancies, *ChemCatChem*, 11 (2019)  
21 2667.
- 22 [9] M. Liu, A. Geng, J. Yan, Construction of WS<sub>2</sub> triangular nanoplates array for  
23 hydrogen evolution reaction over a wide pH range, *Int. J. Hydrogen Energy*, 45 (2020)  
24 2909.
- 25 [10] T. Wang, Z. Hong, F. Sun, B. Wang, C. Jian, W. Liu, Interfacial engineering of  
26 tungstic disulfide-carbide heterojunction for high-current-density hydrogen evolution,  
27 *RSC Adv*, 12 (2022) 27225.
- 28 [11] Z. Zhang, X. Lin, S. Tang, Q. Huang, WS<sub>2</sub>/NiS<sub>x</sub> heterojunction nanosheet clusters:  
29 A highly efficient electrocatalyst for hydrogen evolution reaction, *Int. J. Hydrogen*  
30 *Energy*, 47 (2022) 33643.
- 31 [12] D.R. Paudel, U.N. Pan, R.B. Ghising, P.P. Dhakal, V.A. Dinh, H. Wang, N.H.  
32 Kim, J.H. Lee, Interface modulation induced by the 1T Co-WS<sub>2</sub> shell nanosheet layer  
33 at the metallic NiTe<sub>2</sub>/Ni core-nanoskeleton: Glib electrode-kinetics for HER, OER, and  
34 ORR, *Nano Energy*, 102 (2022) 107712.

- 1 [13] S. Hussain, D. Vikraman, M. Sarfraz, M. Faizan, S.A. Patil, K.M. Batoo, K.W.  
2 Nam, H.S. Kim, J. Jung, Design of  $\text{XS}_2$  (X = W or Mo)-decorated  $\text{VS}_2$  hybrid nano-  
3 architectures with abundant active edge sites for high-rate asymmetric supercapacitors  
4 and hydrogen evolution reactions, *Small*, (2022) e2205881.
- 5 [14] H. Chen, M. Hu, P. Jing, B. Liu, R. Gao, J. Zhang, Constructing heterostructure of  
6  $\text{CeO}_2/\text{WS}_2$  to enhance catalytic activity and stability toward hydrogen generation, *J.*  
7 *Power Sources*, 521 (2022) 230948.
- 8 [15] X. Zhao, X. Ma, J. Sun, D. Li, X. Yang, Enhanced catalytic activities of surfactant-  
9 assisted exfoliated  $\text{WS}_2$  nanodots for hydrogen evolution, *ACS Nano*, 10 (2016) 2159.
- 10 [16] H. Seok, M. Kim, J. Cho, E. Kim, S. Son, K.-W. Kim, J.K. Kim, P.J. Yoo, M. Kim,  
11 H.-U. Kim, T. Kim, Tailoring polymorphic heterostructures of  $\text{MoS}_2$ - $\text{WS}_2$  (1T/1T,  
12 2H/2H) for efficient hydrogen evolution reaction, *ACS Sustainable Chem. Eng.*, 11  
13 (2023) 568.

14
